# Supplementary material
Source: publisher figshare collection journal article supplement (https://springernature.figshare.com/articles/dataset/_/7796105)
Supplement: Supplementary file [file 14509286]

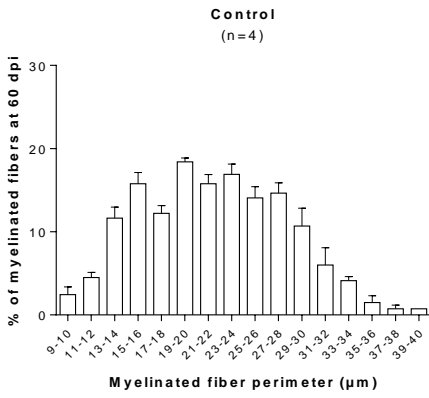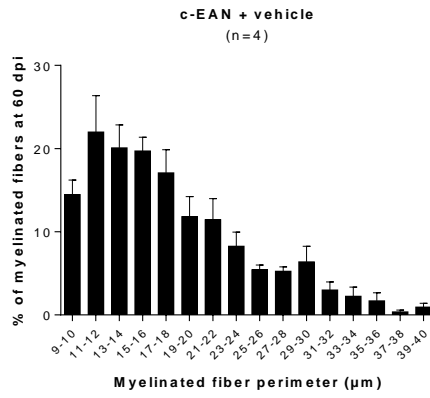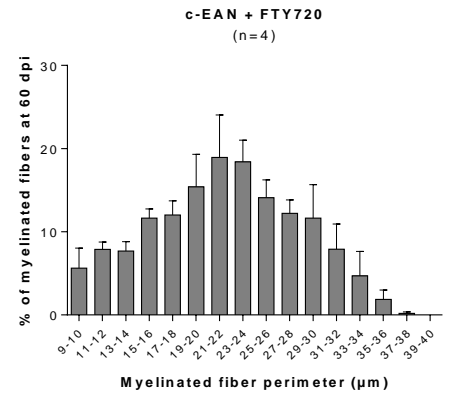

**Additional file 1: Figure S1**
